# Supplementary material for: Model-based virtual patient analysis of human liver regeneration predicts critical perioperative factors controlling the dynamic mode of response to resection
Source: PubMed Central journal article supplement (PMC6335689; doi:10.1186/s12918-019-0678-y), 2019-01-16
Supplement: 12918_2019_678_MOESM1_ESM.pdf [file 12918_2019_678_MOESM1_ESM.pdf]

**Table S1.** Comparison of the metabolic load calculated by the three different approaches of Young et al. [21], Cook et al. [8] and present multivariate optimization approach with the corresponding sum square errors for fit to the liver volume time series data from Yamamoto et al. [18].

| Patient ID | Young et al. |           | Cook et al. |           | Multivariate Optimization |           |
|------------|--------------|-----------|-------------|-----------|---------------------------|-----------|
|            | M            | SSE       | M           | SSE       | M                         | SSE       |
| 4          | 6.13614      | 5.986E-02 | 5.96574     | 5.830E-02 | 5.85537                   | 4.652E-02 |
| 24         | 6.28769      | 2.465E-02 | 6.19516     | 2.512E-02 | 5.81011                   | 1.505E-02 |
| 30         | 6.35691      | 1.391E-02 | 6.30095     | 1.272E-02 | 5.88455                   | 5.419E-03 |
| 31         | 6.20712      | 1.057E-01 | 6.07281     | 1.057E-01 | 5.76161                   | 3.928E-02 |
| 44         | 6.36192      | 1.503E-02 | 6.30863     | 1.666E-02 | 5.78737                   | 8.227E-03 |
| 46         | 6.48053      | 8.481E-03 | 6.49147     | 7.510E-03 | 5.81837                   | 3.672E-03 |
| 71         | 6.36695      | 6.429E-02 | 6.31634     | 6.178E-02 | 5.27725                   | 1.662E-03 |
| 74         | 6.20060      | 1.059E-02 | 6.06294     | 1.017E-02 | 5.85572                   | 8.949E-03 |
| 90         | 6.43058      | 7.067E-04 | 6.41424     | 7.617E-04 | 5.85930                   | 1.498E-03 |
| 93         | 6.48461      | 1.609E-02 | 6.49778     | 1.360E-02 | 5.96303                   | 7.922E-04 |
| 94         | 6.41900      | 2.521E-02 | 6.39639     | 2.267E-02 | 5.82839                   | 2.045E-03 |
| 97         | 6.54534      | 1.723E-02 | 6.59214     | 1.475E-02 | 5.82589                   | 4.779E-03 |
| 104        | 6.51549      | 1.441E-03 | 6.54570     | 1.468E-03 | 5.83453                   | 6.000E-04 |
| 115        | 6.47193      | 6.363E-02 | 6.47815     | 6.082E-02 | 5.84523                   | 6.226E-02 |
| 125        | 6.45081      | 7.149E-02 | 6.44548     | 7.057E-02 | 5.87353                   | 6.887E-02 |
| 133        | 6.29743      | 1.790E-02 | 6.21000     | 1.655E-02 | 5.88404                   | 5.952E-03 |
| 147        | 6.30260      | 1.486E-02 | 6.21789     | 1.394E-02 | 5.82748                   | 8.328E-03 |
| 153        | 6.21445      | 2.895E-01 | 6.08390     | 2.848E-01 | 5.74923                   | 1.440E-01 |
| 156        | 6.30296      | 5.525E-03 | 6.21844     | 6.045E-03 | 5.99036                   | 3.134E-03 |
| 159        | 6.18711      | 6.462E-02 | 6.04255     | 6.235E-02 | 5.88752                   | 4.947E-02 |
| 160        | 6.43077      | 8.404E-02 | 6.41453     | 7.915E-02 | 5.88308                   | 6.245E-03 |
| 176        | 6.51591      | 2.505E-02 | 6.54635     | 2.457E-02 | 5.84513                   | 2.208E-02 |
| 177        | 6.46901      | 4.284E-02 | 6.47362     | 3.906E-02 | 5.87770                   | 1.713E-02 |
| 182        | 6.22332      | 5.839E-03 | 6.09733     | 5.939E-03 | 5.81962                   | 3.596E-03 |
| 186        | 6.25998      | 3.077E-02 | 6.15298     | 2.985E-02 | 5.85235                   | 1.986E-02 |
| 192        | 6.33958      | 3.813E-02 | 6.27440     | 3.462E-02 | 6.10168                   | 8.002E-03 |
| 196        | 6.30296      | 1.826E-02 | 6.21844     | 1.890E-02 | 6.10168                   | 1.334E-02 |
