# Supplementary material for: Model-based virtual patient analysis of human liver regeneration predicts critical perioperative factors controlling the dynamic mode of response to resection
Source: PubMed Central journal article supplement (PMC6335689; doi:10.1186/s12918-019-0678-y), 2019-01-16
Supplement: 12918_2019_678_MOESM3_ESM.pdf [file 12918_2019_678_MOESM3_ESM.pdf]

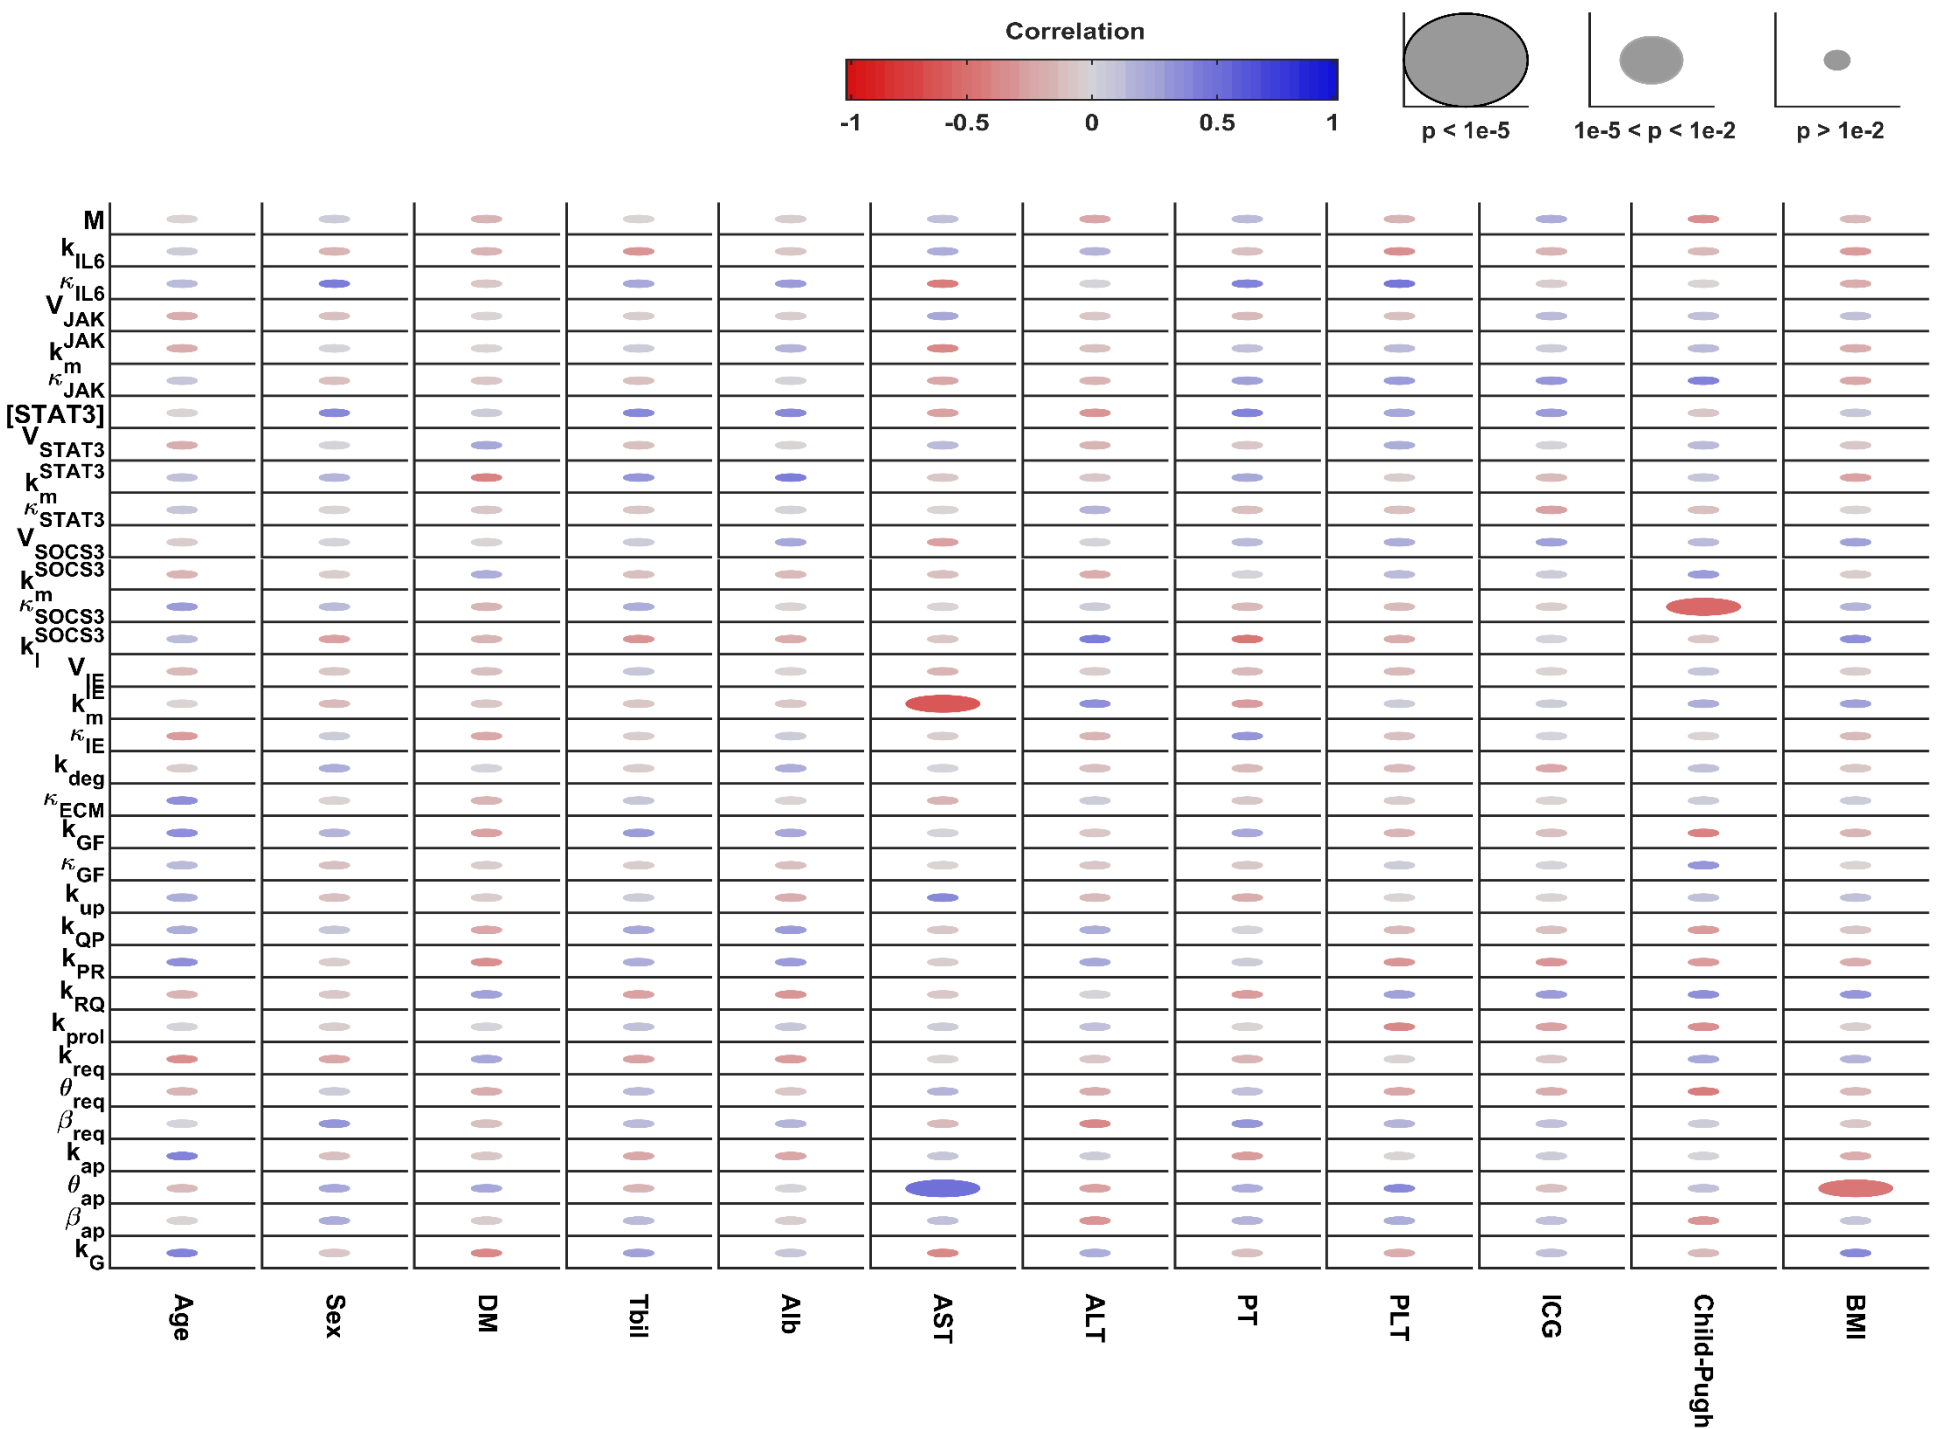

**Figure S2:** Pairwise correlation between optimized model parameters with clinical data of the 27 patients from Yamamoto et al. [18]. There is no significant pairwise correlation between parameters and the available clinical information (Bonferroni corrected p-value  $< 1e-5$ ).
