# Supplementary material for: Model-based virtual patient analysis of human liver regeneration predicts critical perioperative factors controlling the dynamic mode of response to resection
Source: PubMed Central journal article supplement (PMC6335689; doi:10.1186/s12918-019-0678-y), 2019-01-16

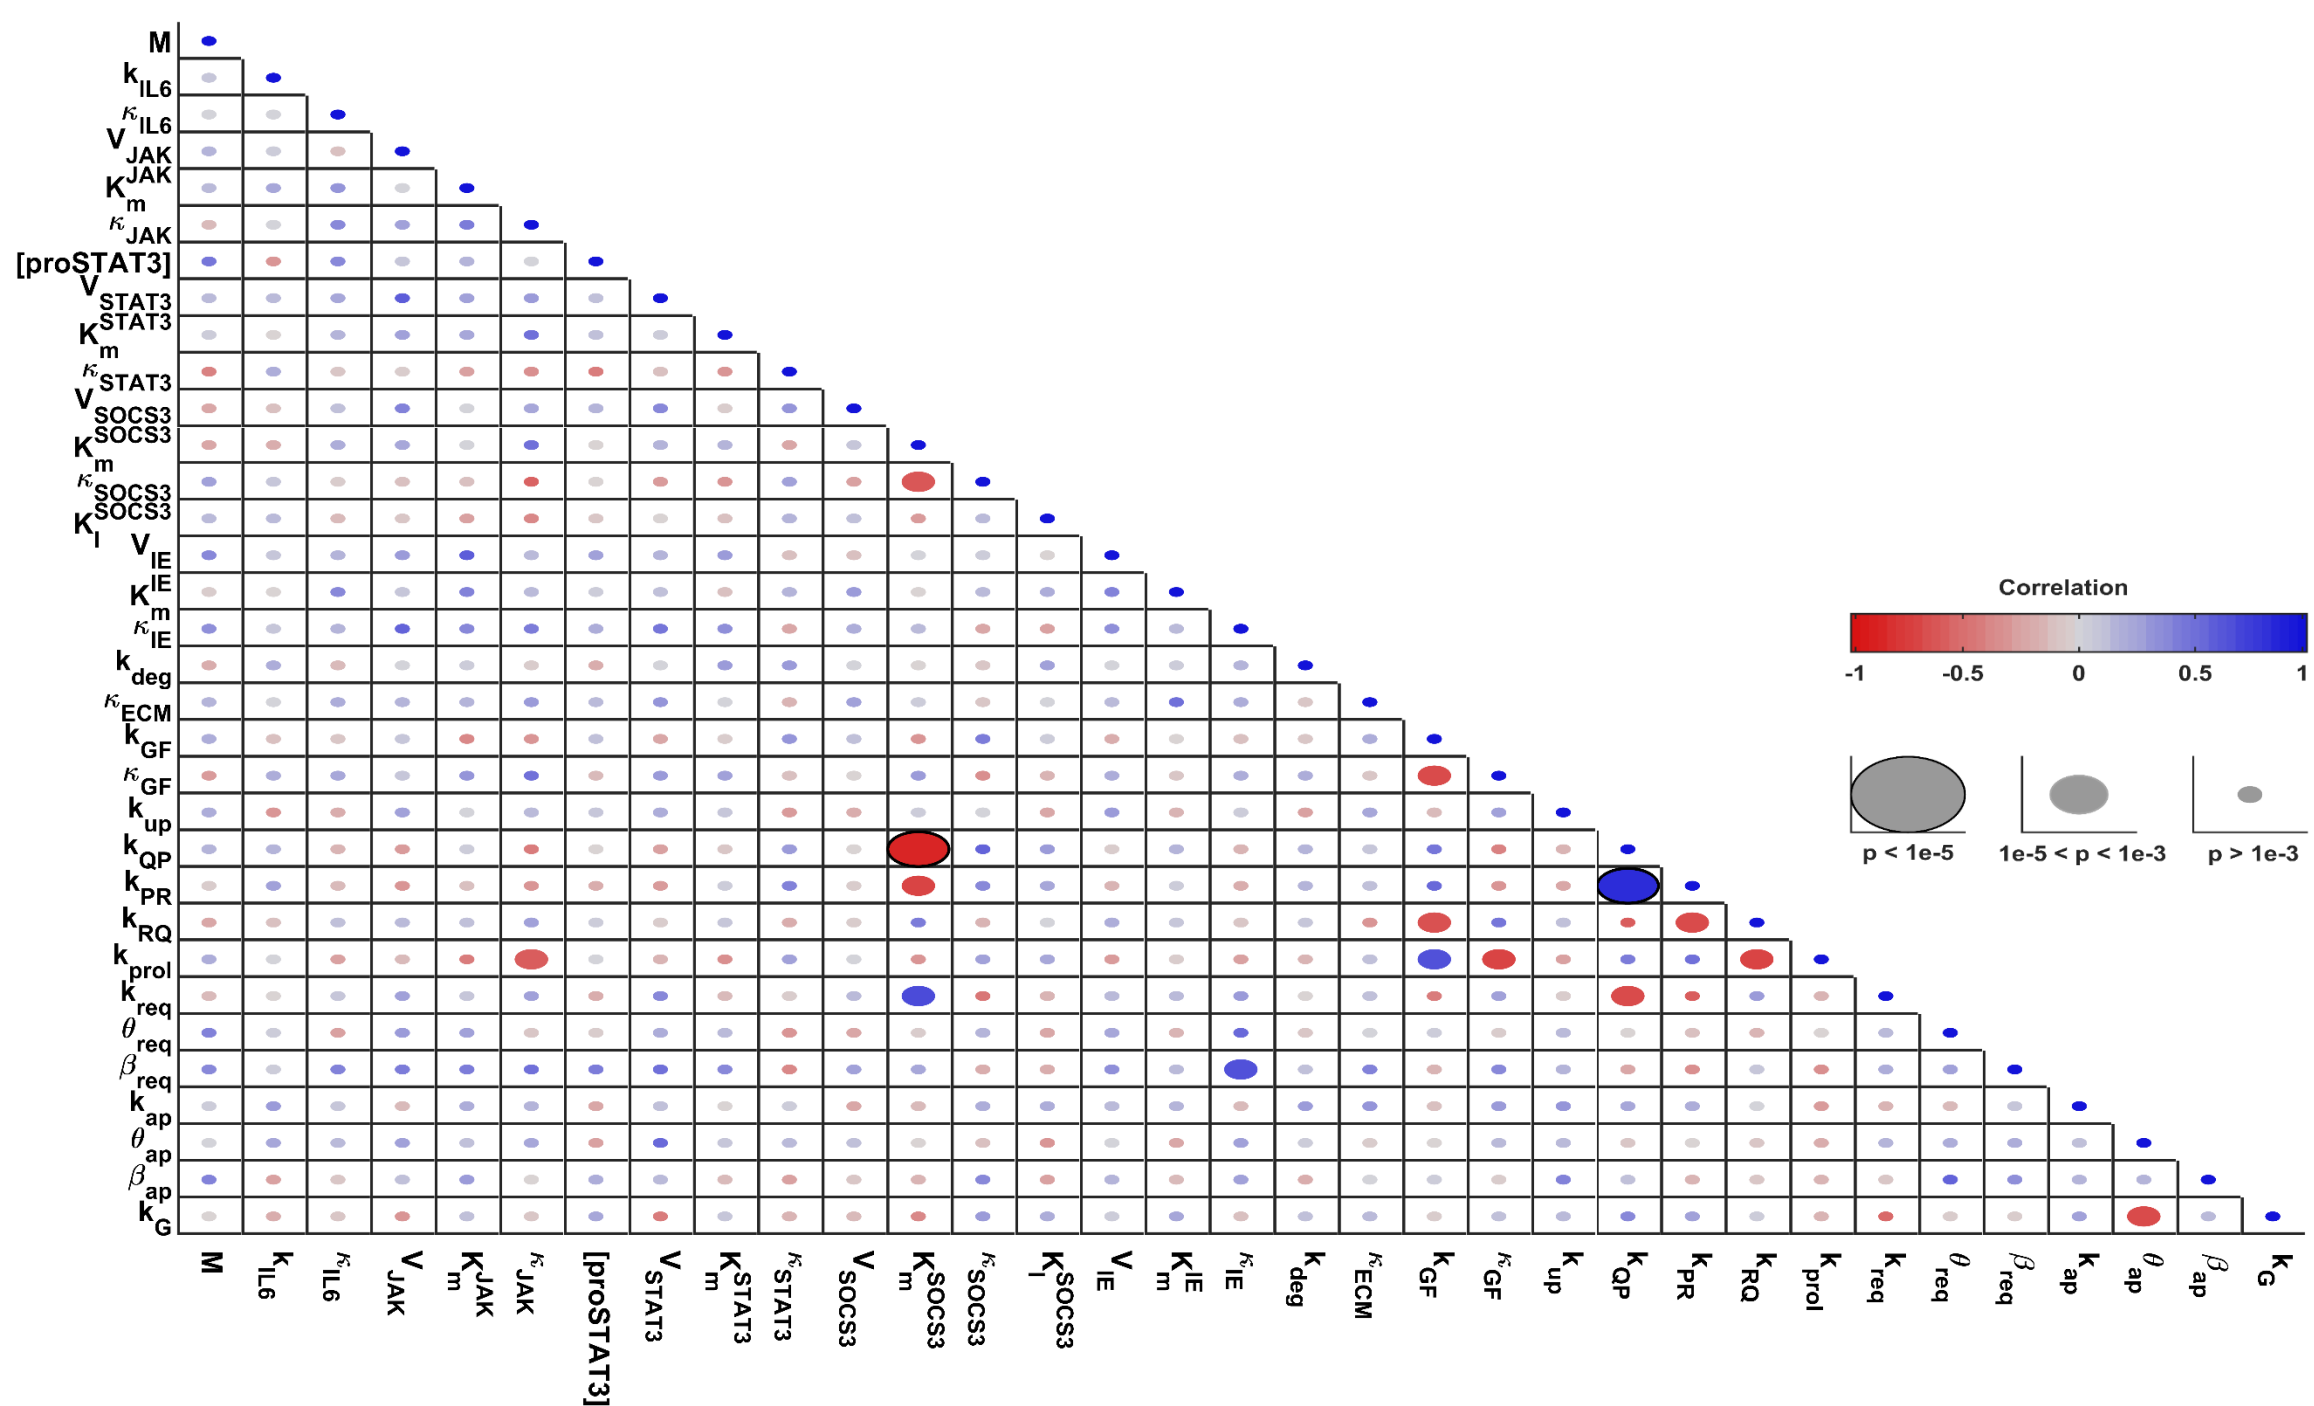

Supplement: 12918_2019_678_MOESM4_ESM.pdf [file 12918_2019_678_MOESM4_ESM.pdf]
