# Supplementary material for: Model-based virtual patient analysis of human liver regeneration predicts critical perioperative factors controlling the dynamic mode of response to resection
Source: PubMed Central journal article supplement (PMC6335689; doi:10.1186/s12918-019-0678-y), 2019-01-16
Supplement: 12918_2019_678_MOESM5_ESM.pdf [file 12918_2019_678_MOESM5_ESM.pdf]

**Table S2:** Model parameters categorized according to the effect on the liver response outcome in the Cook et al. [8] model. Due to numerical difficulties in integrating the Cook et al. [8] model for certain parameter values, the effects of variation in the parameters  $M$ ,  $k_{IL6}$ ,  $k_{prol}$ ,  $\theta_{ap}$ ,  $\beta_{ap}$  were evaluated in a more restricted range than the present model.

| Only recovery                                                                                                                           |                                                                                                                                                                           | Both recovery and failure                                   |                                  |
|-----------------------------------------------------------------------------------------------------------------------------------------|---------------------------------------------------------------------------------------------------------------------------------------------------------------------------|-------------------------------------------------------------|----------------------------------|
| Sensitive                                                                                                                               |                                                                                                                                                                           | Insensitive                                                 |                                  |
| Improves recovery                                                                                                                       | Decelerate recovery                                                                                                                                                       |                                                             |                                  |
| $k_{IL6}, [prosSTAT3],$<br>$\kappa_{SOCS3}, K_I^{SOCS3}, V_{IE},$<br>$k_{deg}, k_{GF}, k_{QP}, k_{PR},$<br>$k_{prol}, \beta_{req}, k_G$ | $\kappa_{IL6}, K_M^{JAK}, \kappa_{JAK},$<br>$K_M^{ST3}, V_{SOCS3},$<br>$K_M^{SOCS3}, K_M^{IE}, \kappa_{IE},$<br>$\kappa_{ECM}, \kappa_{GF}, k_{up},$<br>$k_{RQ}, k_{req}$ | $V_{JAK}, V_{ST3}, \kappa_{ST3},$<br>$\theta_{req}, k_{ap}$ | $M, \beta_{ap}$<br>$\theta_{ap}$ |
