# Supplementary material for: Model-based virtual patient analysis of human liver regeneration predicts critical perioperative factors controlling the dynamic mode of response to resection
Source: PubMed Central journal article supplement (PMC6335689; doi:10.1186/s12918-019-0678-y), 2019-01-16
Supplement: 12918_2019_678_MOESM9_ESM.pdf [file 12918_2019_678_MOESM9_ESM.pdf]

**Table S3:** Biological description of each of the model parameters with their upper and the lower bounds used for optimization via elastic net with Ridge and Lasso weightage of  $10^{-3}$  :

| Parameter        | Lower bound | Upper bound | Description                                                                  |
|------------------|-------------|-------------|------------------------------------------------------------------------------|
| M                | 0.580       | 58          | Mechanical stress due to nutrient and detoxification demand                  |
| $k_{IL6}$        | 0.150       | 15          | Production rate constant of IL6 from non-parenchymal cells                   |
| $\kappa_{IL6}$   | 0.090       | 9           | Degradation rate of IL6                                                      |
| $V_{JAK}$        | 2000        | 200000      | Maximum rate of JAK activation                                               |
| $K_M^{JAK}$      | 1000        | 100000      | Michaelis-Menten concentration of JAK                                        |
| $\kappa_{JAK}$   | 0.040       | 4           | Rate of degradation of JAK                                                   |
| [proSTAT3]       | 0.010       | 20          | Relative concentration of monomeric STAT3                                    |
| $V_{ST3}$        | 75.0        | 7500        | Maximum rate of STAT3 phosphorylation                                        |
| $K_M^{ST3}$      | 0.040       | 40          | Michaelis-Menten concentration of proSTAT3                                   |
| $\kappa_{ST3}$   | 0.050       | 1           | Rate of dephosphorylation of proSTAT3                                        |
| $V_{SOCS3}$      | 14000       | 34000       | Maximum rate of SOCS3 activation                                             |
| $K_M^{SOCS3}$    | 0.000       | 0.001       | Michaelis-Menten concentration of SOCS3                                      |
| $\kappa_{SOCS3}$ | 0.100       | 0.700       | Degradation rate of SOCS3                                                    |
| $K_I^{SOCS3}$    | 0.005       | 0.025       | Inhibition constant of SOCS3                                                 |
| $V_{IE}$         | 150         | 350         | Maximum rate of IE gene activation                                           |
| $K_M^{IE}$       | 15          | 21          | Concentration of IE gene, when it's activation rate is half the maximum rate |
| $\kappa_{IE}$    | 3           | 7           | Degradation rate of IE gene                                                  |
| $k_{deg}$        | 5.000       | 9           | Degradation rate of ECM by MMPs                                              |
| $\kappa_{ECM}$   | 30.000      | 36          | Degradation rate of ECM                                                      |

|                |        |        |                                                                                                                                                     |
|----------------|--------|--------|-----------------------------------------------------------------------------------------------------------------------------------------------------|
| $k_{GF}$       | 0.050  | 0.20   | Rate constant for production of growth factor from non-parenchymal cells                                                                            |
| $\kappa_{GF}$  | 0.100  | 0.35   | Degradation rate constant of growth factor                                                                                                          |
| $k_{up}$       | 0.040  | 0.08   | Growth factor binding rate to ECM                                                                                                                   |
| $k_{QP}$       | 0.005  | 0.009  | Transition rate of hepatocytes from quiescence to primed state                                                                                      |
| $k_{PR}$       | 0.003  | 0.006  | Transition rate of hepatocytes from primed to replicating state                                                                                     |
| $k_{RQ}$       | 0.040  | 0.065  | Transition rate of hepatocytes from replicating to quiescence state                                                                                 |
| $k_{prol}$     | 0.010  | 0.03   | Proliferation rate of hepatocytes                                                                                                                   |
| $k_{req}$      | 0.050  | 0.15   | Transition rate of hepatocytes from primed to quiescent state                                                                                       |
| $\theta_{req}$ | 6.000  | 10     | Requiescence parameter in the sigmoidal function ( $\sigma_{req}$ ) defining the threshold of hepatocytes transition from primed to quiescent state |
| $\beta_{req}$  | 2.000  | 4      | Requiescence parameter in the sigmoidal function ( $\sigma_{req}$ ) defining the threshold of hepatocytes transition from primed to quiescent state |
| $k_{ap}$       | 0.050  | 0.150  | Cell death rate constant of damaged hepatocytes                                                                                                     |
| $\theta_{ap}$  | 0.030  | 0.044  | Cell death sensitivity parameter of the sigmoidal function ( $\sigma_{ap}$ )                                                                        |
| $\beta_{ap}$   | 0.003  | 0.006  | Cell death sensitivity parameter of the sigmoidal function ( $\sigma_{ap}$ )                                                                        |
| $k_G$          | 0.0003 | 0.0007 | Relative cell mass growth rate constant                                                                                                             |
