# Supplementary material for: Model-based virtual patient analysis of human liver regeneration predicts critical perioperative factors controlling the dynamic mode of response to resection
Source: PubMed Central journal article supplement (PMC6335689; doi:10.1186/s12918-019-0678-y), 2019-01-16
Supplement: 12918_2019_678_MOESM12_ESM.pdf [file 12918_2019_678_MOESM12_ESM.pdf]

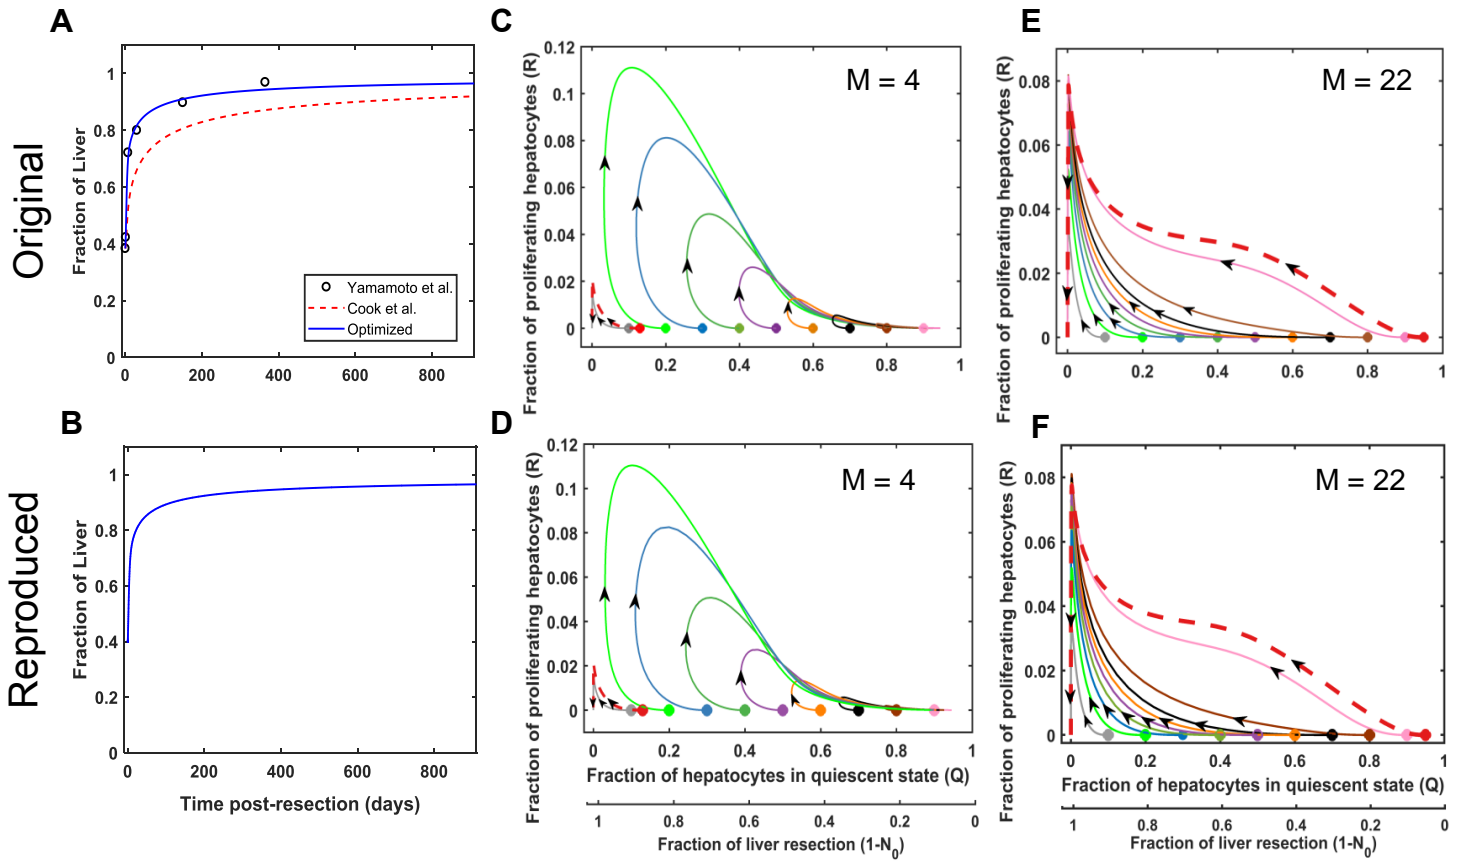

**Figure S6:** Model reproducibility. The simulation results presented in this work were independently reproduced using the model equations and the parameters given in the main text. (A-B): Original and reproduced regeneration profiles are shown in panels (A) and (B), respectively. Optimized parameter values given in Table 1 of the main text were used to reproduce the regeneration profile. (C-F) show that the reproduced phase plane yields the same behavior as the original phase plane for the virtual patients with optimized parameters given in Table 1 of the main text and the metabolic load as mentioned in the figure.
